# Supplementary material for: An epistatic interaction between pre-natal smoke exposure and socioeconomic status has a significant impact on bronchodilator drug response in African American youth with asthma
Source: BioData Min. 2020 Jul 3;13:7. doi: 10.1186/s13040-020-00218-7 (PMC7333373; doi:10.1186/s13040-020-00218-7)
Supplement: Supplementary file 4 — Additional file 4: Supplemental Table 4. Phenotypic data included for analysis in this study. Description of data: Description and categorization of data included in ViSEN analyses. [file 13040_2020_218_MOESM4_ESM.docx]

**Supplemental Table 4.** Phenotypic data included for analysis in this study.

| *Variable Name* | *Classification* | *Ranking* |
| --- | --- | --- |
| Age | < sample median | 0 |
| ≥ sample median | 1 |
| Air Pollution (NO2) | < sample median | 0 |
| ≥ sample median | 1 |
| Body Mass Index | Non-Obese | 0 |
| Obese | 1 |
| Bronchodilator Drug Response (BDR) | BDR Non-Responder : < 12% ΔFEV1* | 0 |
| BDR Responder: ≥ 12% ΔFEV1* | 1 |
| Experience of Discrimination | No Experience of Discrimination | 0 |
| Any Experience of Discrimination | 1 |
| Global African Ancestry | < 80% Ancestry | 0 |
| ≥ 80% Ancestry | 1 |
| Prenatal Smoke Exposure | Mother Non-Smoker | 0 |
| Mother Active Smoker | 1 |
| Sex | Female | 0 |
| Male | 1 |
| Socioeconomic Status | Low | 0 |
| Medium or High | 1 |

*ΔFEV1 was calculated as described in Methods.
